# Supplementary material
Source: PubMed Central journal article supplement (PMC7269991)
Supplement: ajtr0012-1824-f7.pdf [file ajtr0012-1824-f7.pdf]

## The prognostic values of SOCSs in ovarian cancer

**Supplementary Table 1.** The specific Affymetrix ID of each SOCS member in Kaplan-Meier plotter

| Gene  | Affymetrix ID |
|-------|---------------|
| SOCS1 | 210001_s_at   |
| SOCS2 | 232539_at     |
| SOCS3 | 227697_at     |
| SOCS4 | 226178_at     |
| SOCS5 | 209648_x_at   |
| SOCS6 | 227542_at     |
| SOCS7 | 228662_at     |
| CISH  | 223377_x_at   |

**Supplementary Table 2.** Protein expression patterns of each SOCS member in OC using the HPA

| Gene  | Antibody  | High | Medium | Low | Not-detected | Total |
|-------|-----------|------|--------|-----|--------------|-------|
| SOCS1 | CAB010355 | 2    | 6      | 4   | 0            | 12    |
| SOCS2 | CAB010356 | 2    | 10     | 0   | 0            | 12    |
| SOCS3 | CAB012220 | 0    | 4      | 4   | 3            | 11    |
| SOCS4 | CAB013478 | 1    | 3      | 0   | 8            | 12    |
| SOCS5 | CAB025510 | 4    | 5      | 0   | 3            | 12    |
| SOCS6 | CAB010189 | 0    | 5      | 7   | 0            | 12    |
| SOCS7 | HPA004475 | 3    | 0      | 0   | 8            | 11    |
| CISH  | HPA040812 | 2    | 3      | 3   | 4            | 12    |

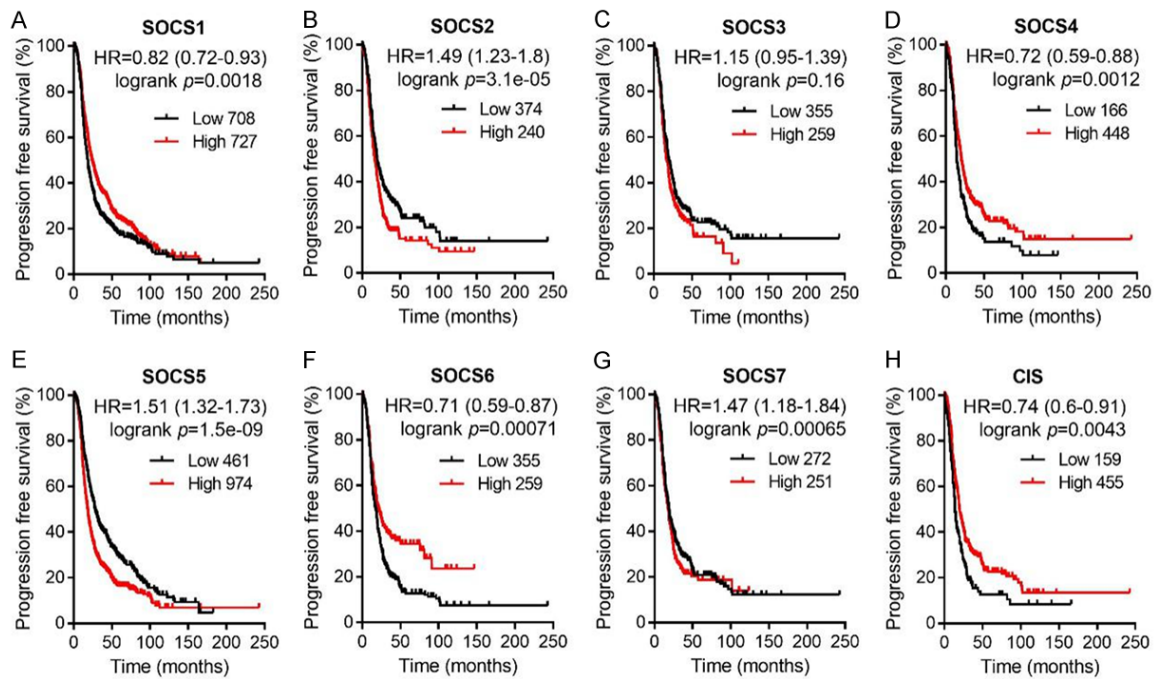

**Supplementary Figure 1.** Progression-free survival analysis of SOCS1 (A), SOCS2 (B), SOCS3 (C), SOCS4 (D), SOCS5 (E), SOCS6 (F), SOCS7 (G), CISH (H) in OC patients using Kaplan-Meier plotter. Patients with expression above the median are indicated in red line, and patients with expressions below the median are indicated in black line. HR means hazard ratio.

## The prognostic values of SOCSs in ovarian cancer

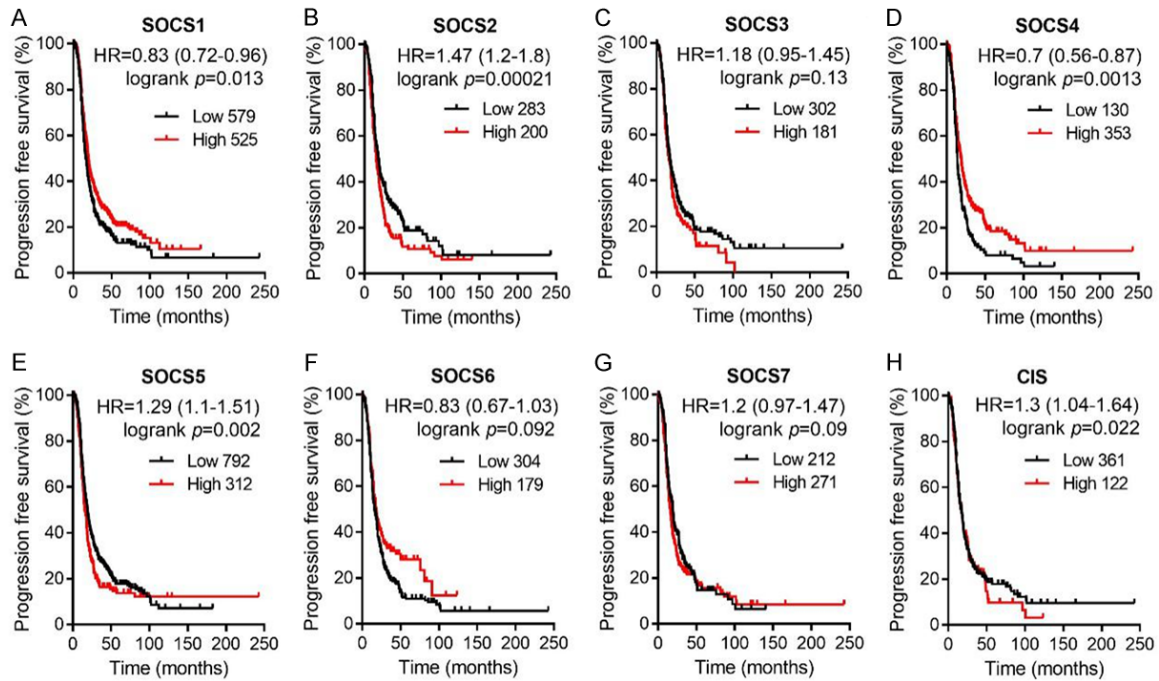

**Supplementary Figure 2.** Progression-free survival analysis of SOCS1 (A), SOCS2 (B), SOCS3 (C), SOCS4 (D), SOCS5 (E), SOCS6 (F), SOCS7 (G), CIS (H) in OSC patients using Kaplan-Meier plotter. Patients with expression above the median are indicated in red line, and patients with expressions below the median are indicated in black line. HR means hazard ratio.
